# Supplementary material for: Homeostatic plasticity fails at the intersection of autism-gene mutations and a novel class of common genetic modifiers
Source: eLife journal article supplement (doi:10.7554/elife.55775), 2020-07-01
Supplement: supp [file elife-55775-supp-v1.zip]

Archive with 12 entries (12 files):
- elife_poa_e55775_Figure_1_figure_supplement_1.pdf
- elife_poa_e55775_Figure_1_figure_supplement_2.pdf
- elife_poa_e55775_Figure_4_figure_supplement_1.pdf
- elife_poa_e55775_Figure_5_figure_supplement_1.pdf
- elife_poa_e55775_Figure_5_figure_supplement_2.pdf
- elife_poa_e55775_Figure_5_figure_supplement_3.pdf
- elife_poa_e55775_Figure_6_figure_supplement_1.pdf
- elife_poa_e55775_Figure_8_figure_supplement_1.pdf
- elife_poa_e55775_Figure_8_figure_supplement_2.pdf
- elife_poa_e55775_Figure_8_figure_supplement_3.pdf
- elife_poa_e55775_Supplementary_file_1.docx
- elife_poa_e55775_Transparent_Reporting_File.docx
