# Supplementary figures and images for: Homeostatic plasticity fails at the intersection of autism-gene mutations and a novel class of common genetic modifiers
Source: eLife journal article supplement (doi:10.7554/elife.55775), 2020-07-01

Figure 4- figure supplement 1

One-way ANOVA with Dunnett's multiple comparisons test (compared to W1118)

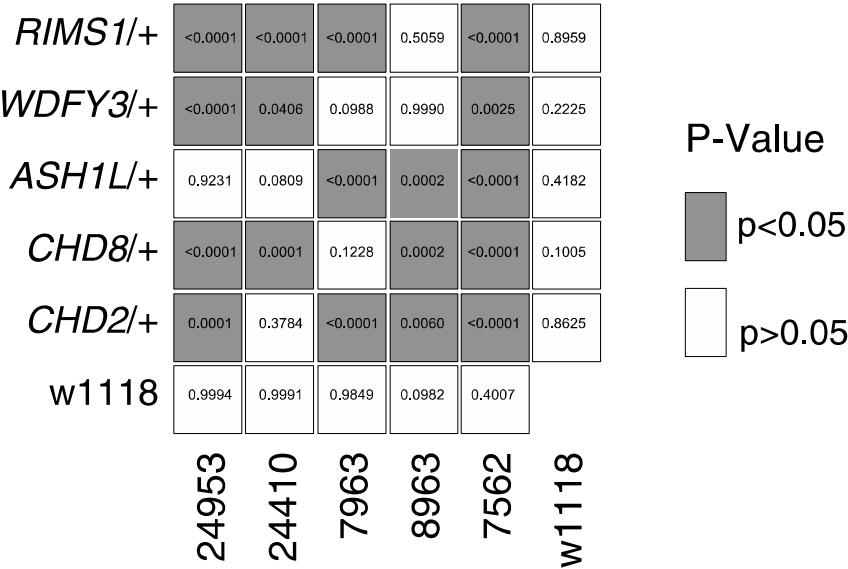

Supplement: supp [file elife-55775-supp-v1.zip]

Figure 8 - figure supplement 1

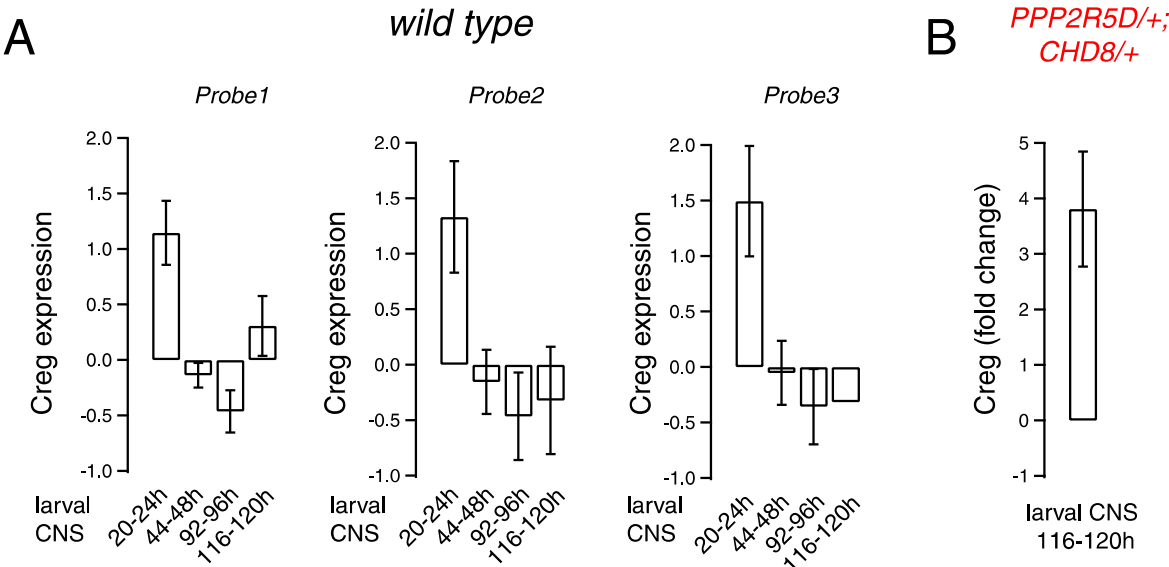

Supplement: supp [file elife-55775-supp-v1.zip]

Figure 6 - figure supplement 1

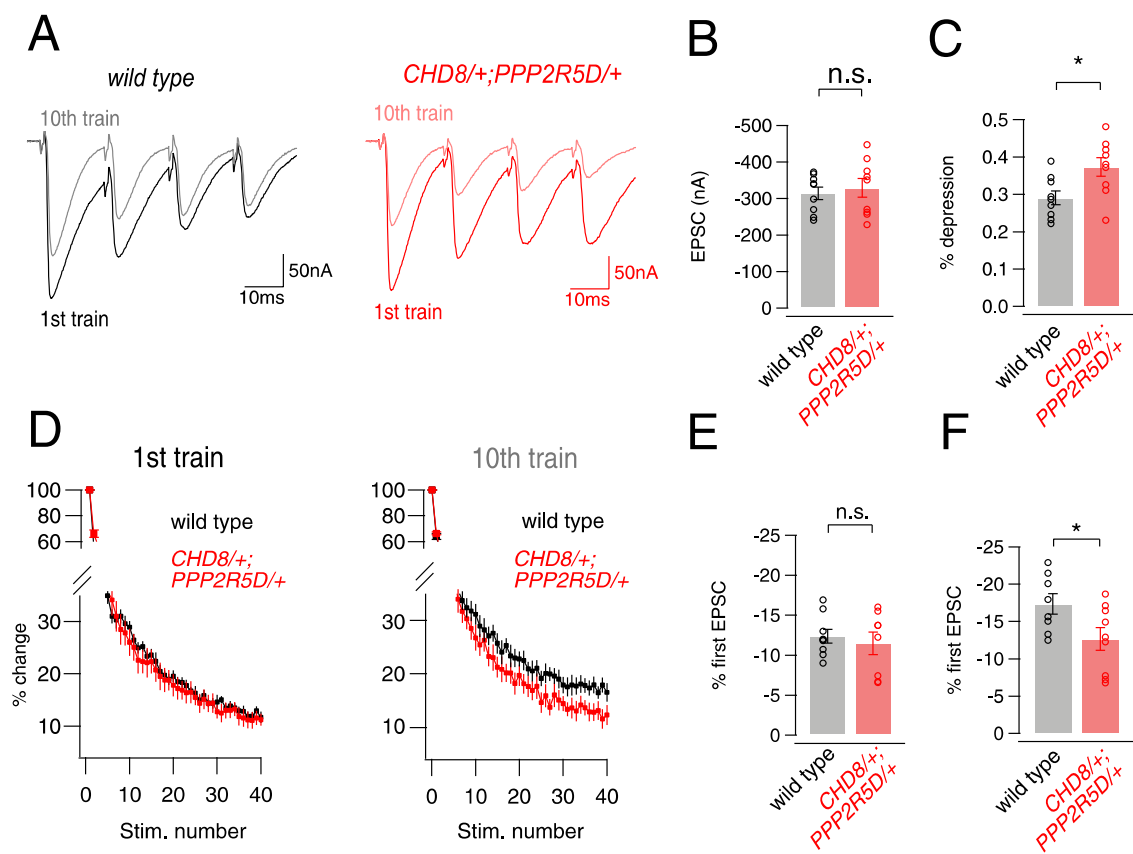

Supplement: supp [file elife-55775-supp-v1.zip]

Figure 8 - figure supplement 2

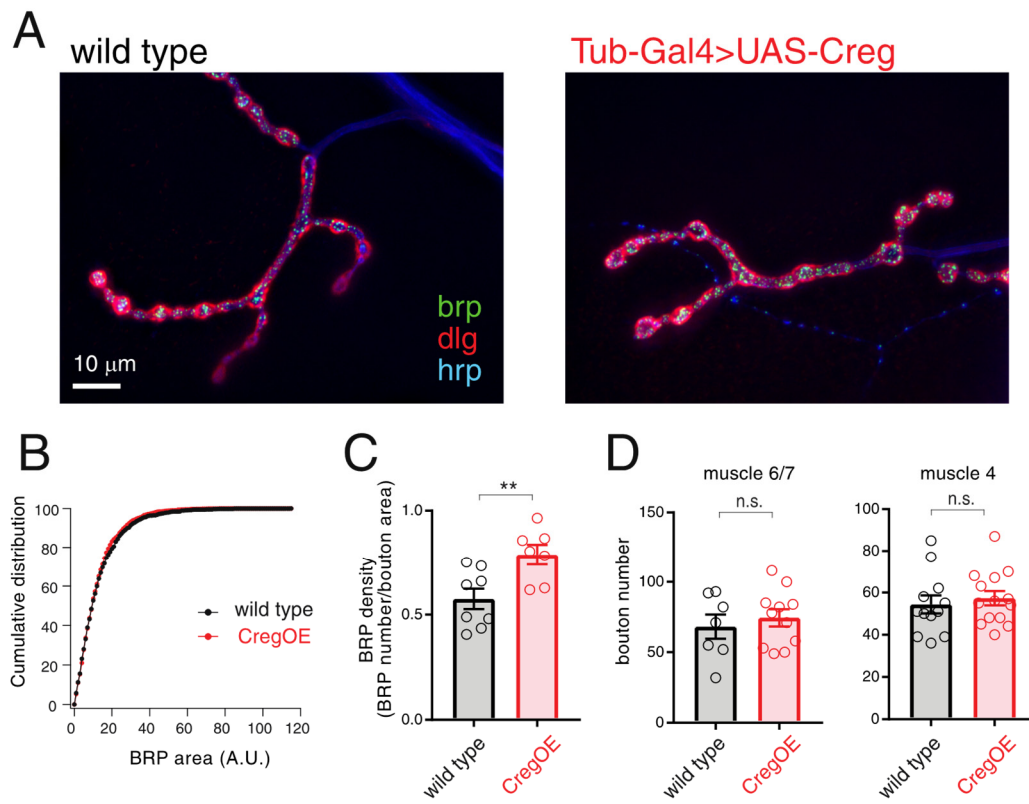

Supplement: supp [file elife-55775-supp-v1.zip]

Figure 1- figure supplement 2

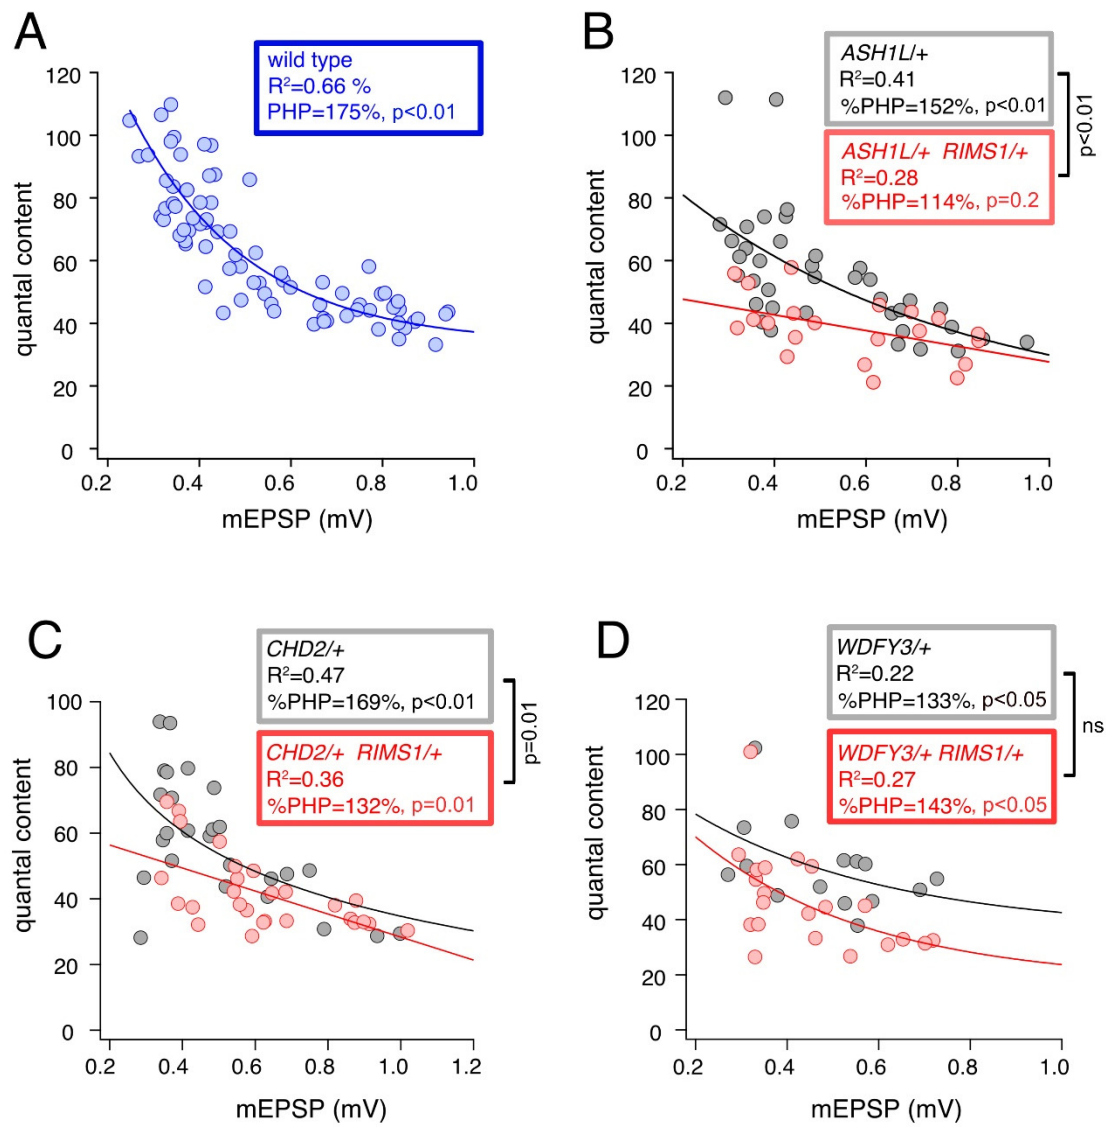

Supplement: supp [file elife-55775-supp-v1.zip]

Figure 5- figure supplement 1

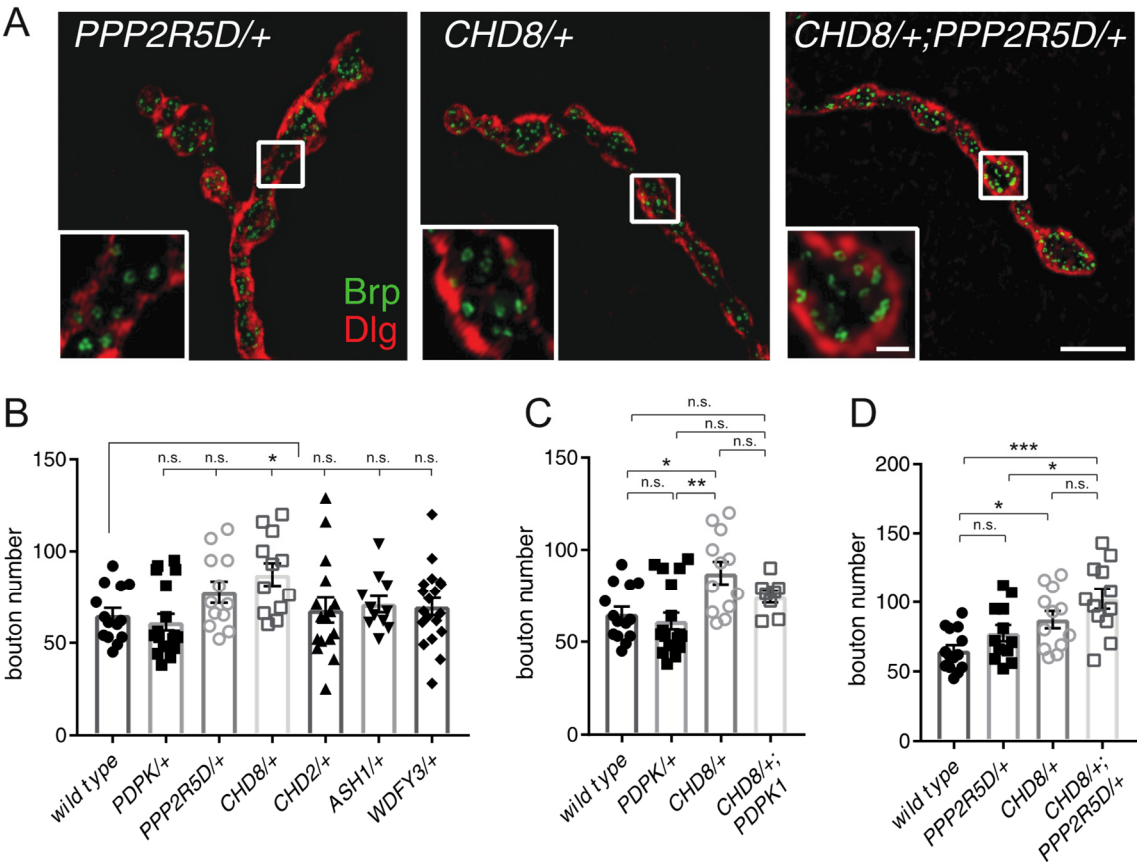

Supplement: supp [file elife-55775-supp-v1.zip]

Figure 1 - figure supplement 1

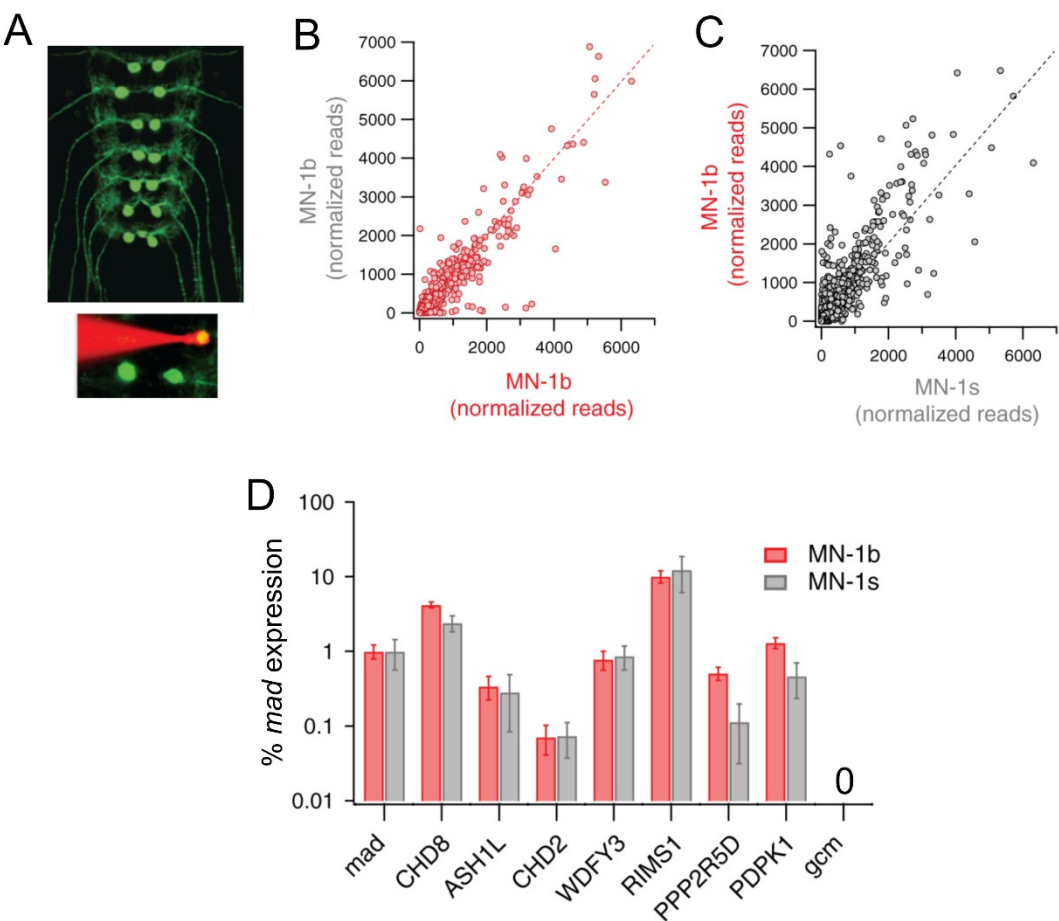

Supplement: supp [file elife-55775-supp-v1.zip]

**Figure 8 - figure supplement 3**

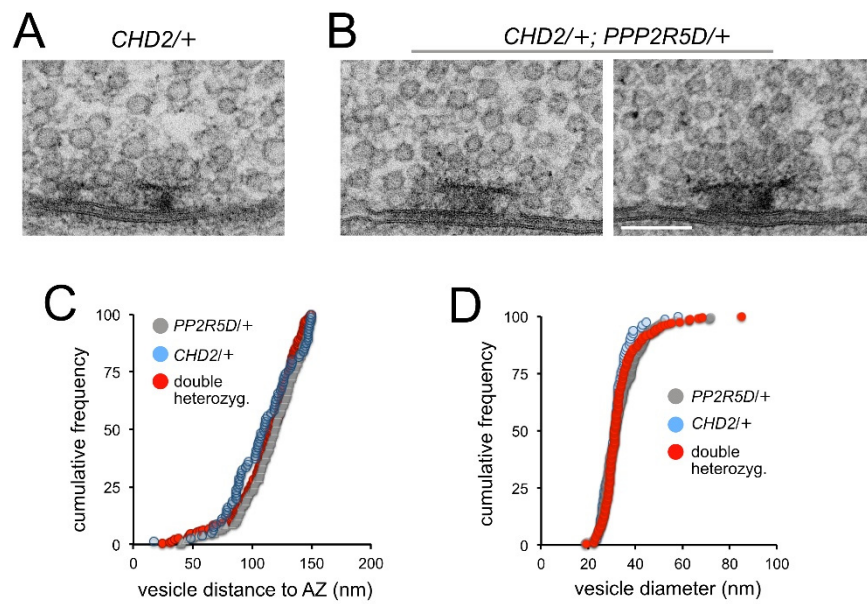

Supplement: supp [file elife-55775-supp-v1.zip]

Figure 5 - figure supplement 2

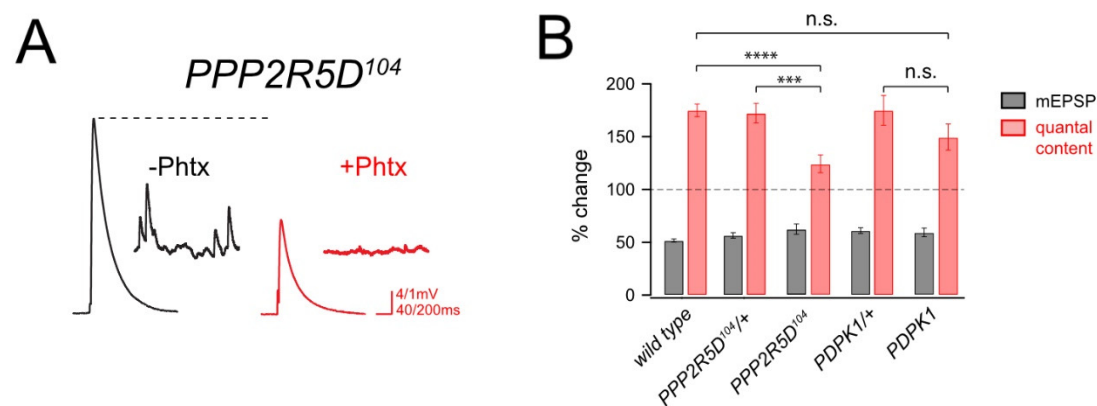

Supplement: supp [file elife-55775-supp-v1.zip › elife_poa_e55775_Figure_5_figure_supplement_2.pdf]

Figure 5 - figure supplement 3

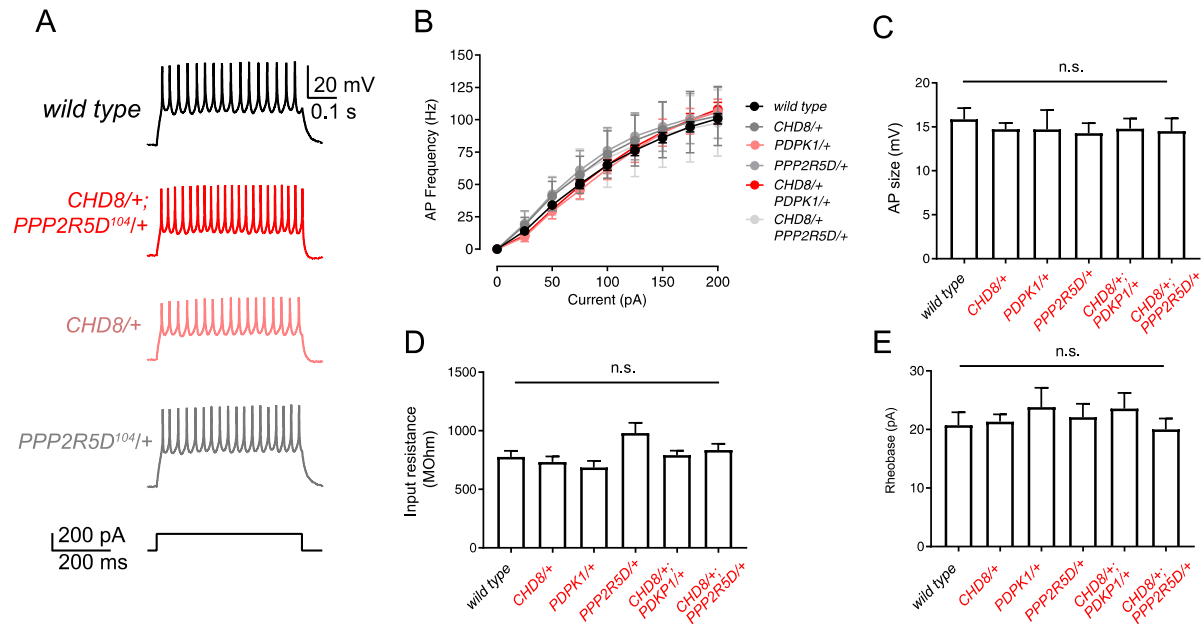

Supplement: supp [file elife-55775-supp-v1.zip › elife_poa_e55775_Figure_5_figure_supplement_3.pdf]
